# Supplementary material for: Long-Term Paired Associative Stimulation Enhances Motor Output of the Tetraplegic Hand
Source: PubMed Central journal article supplement — J Neurotrauma. 2017 Sep 15;34(18):2668–74. doi: 10.1089/neu.2017.4996 (PMC5610384; doi:10.1089/neu.2017.4996), 2017-09-15
Supplement: Supp_Table1.pdf [file Supp_Table1.pdf]

## Supplementary Data

SUPPLEMENTARY TABLE S1. RAW DATA, HAND MOTOR SCORES OF EACH PATIENT

| PATIENT 1                                   | PAS hand |        |       |                 |            | PNS hand                |                          |        |       |                 |            |                         |                          |
|---------------------------------------------|----------|--------|-------|-----------------|------------|-------------------------|--------------------------|--------|-------|-----------------|------------|-------------------------|--------------------------|
|                                             |          | before | after | 1 month control | during PAS | CHANGE during follow-up | during PAS and follow-up | before | after | 1 month control | during PNS | CHANGE during follow-up | during PNS and follow-up |
|                                             |          |        |       |                 |            |                         |                          |        |       |                 |            |                         |                          |
| flexor carpi radialis                       | med      |        |       |                 |            |                         | 4                        | 5      | 5     | 1               |            | 1                       |                          |
| flexor digitorum superficialis              | med      |        |       |                 |            |                         | 0                        | 0      | 1     | 0               | 1          | 1                       |                          |
| flexor digitorum profundus (fingers II-III) | med      |        |       |                 |            |                         | 0                        | 0      | 1     | 0               | 1          | 1                       |                          |
| flexor pollicis brevis                      | med      | 3      | 4     | 5               | 1          | 1                       | 1                        | 3      | 3     | 2               | 0          | 2                       |                          |
| flexor pollicis longus                      | med      | 3      | 4     | 4               | 1          | 0                       | 2                        | 3      | 3     | 1               | 0          | 1                       |                          |
| opponens pollicis                           | med      | 3      | 4     | 4               | 1          | 0                       | 1                        | 3      | 1     | 2               | -2         | 0                       |                          |
| abductor pollicis brevis                    | med      | 3      | 3     | 3               | 0          | 0                       | 0                        | 0      | 0     | 0               | 0          | 0                       |                          |
| adductor pollicis                           | uln      | 4      | 5     | 5               | 1          |                         | 0                        | 3      | 2     | 3               | -1         | 2                       |                          |
| dorsal interossei                           | uln      | 0      | 1     | 1               | 1          | 0                       | 1                        | 0      | 1     | -1              | 1          | 0                       |                          |
| abductor digiti minimi                      | uln      | 0      | 3     | 3               | 3          | 0                       | 3                        | 3      | 3     | 0               | 0          | 0                       |                          |
| palmar interossei                           | uln      | 3      | 4     | 4               | 1          | 0                       | 0                        | 1      | 1     | 1               | 0          | 1                       |                          |
| flexor digitorum profundus (fingers IV-V)   | uln      |        |       |                 |            |                         | 1                        | 0      | 1     | -1              | 1          | 0                       |                          |
| flexor carpi ulnaris                        | uln      |        |       |                 |            |                         | 3                        | 4      | 5     | 1               | 1          | 2                       |                          |
| extensor digitorum                          | rad      |        |       |                 |            |                         | 1                        | 1      | 1     | 0               | 0          | 0                       |                          |
| abductor pollicis longus                    | rad      | 4      | 5     | 4               | 1          |                         | 0                        | 0      | 0     | 0               | 0          | 0                       |                          |
| extensor pollicis longus                    | rad      | 3      | 4     | 5               | 1          | 1                       | 2                        | 3      | 3     | 1               | 0          | 1                       |                          |
| extensor pollicis brevis                    | rad      | 3      | 4     | 5               | 1          | 1                       | 2                        | 3      | 3     | 2               | 0          | 2                       |                          |
| <b>AVERAGE</b>                              |          |        |       |                 | 1.09       | 0.33                    |                          |        |       | 0.71            | 0.13       | 0.82                    |                          |
| <b>% PAS of PNS</b>                         |          |        |       |                 | <b>154</b> | <b>267</b>              |                          |        |       |                 |            | <b>155</b>              |                          |

(continued)



SUPPLEMENTARY TABLE S1. (CONTINUED)

| PATIENT 3                                   | PAS hand |       |                 |            | PNS hand                 |                          |        |       |                 |            |                          |                          |
|---------------------------------------------|----------|-------|-----------------|------------|--------------------------|--------------------------|--------|-------|-----------------|------------|--------------------------|--------------------------|
|                                             | before   | after | 1 month control | during PAS | CHANGE during follow -up | during PAS and follow-up | before | after | 1 month control | during PNS | CHANGE during follow -up | during PNS and follow-up |
|                                             |          |       |                 |            |                          |                          |        |       |                 |            |                          |                          |
| pronator teres and quadratus                | med      | 3     | 4               | 4          | 1                        | 0                        | 1      | 4     | 3               | 3          | 0                        | -1                       |
| flexor carpi radialis                       | med      | 1     | 1               | 3          | 0                        | 2                        | 2      | 4     | 4               | 2          | 0                        | -2                       |
| flexor digitorum superficialis              | med      | 1     | 2               | 2          | 1                        | 0                        | 1      |       |                 |            |                          |                          |
| flexor digitorum profundus (fingers II-III) | med      | 1     | 1               | 1          | 0                        | 0                        | 0      | 4     | 4               | 4          | 0                        | 0                        |
| flexor pollicis brevis                      | med      |       |                 |            |                          |                          |        | 3     | 3               | 3          | 0                        | 0                        |
| opponens pollicis                           | med      |       |                 |            |                          |                          |        | 4     | 4               | 4          | 0                        | 0                        |
| abductor pollicis brevis                    | med      |       |                 |            |                          |                          |        | 4     | 5               | 5          | 1                        | 1                        |
| dorsal interossei                           | uln      | 0     | 0               | 0          | 0                        | 0                        | 0      | 1     | 3               | 3          | 2                        | 0                        |
| abductor digiti minimi                      | uln      | 1     | 3               | 2          | 2                        | -1                       | 1      | 4     | 5               | 5          | 1                        | 1                        |
| palmar interossei                           | uln      | 1     | 0               | 0          | -1                       | 0                        | -1     | 1     | 3               | 4          | 2                        | 1                        |
| flexor digitorum profundus (fingers IV-V)   | uln      | 0     | 1               | 1          | 1                        | 0                        | 1      | 3     | 4               | 4          | 1                        | 0                        |
| flexor carpi ulnaris                        | uln      | 0     | 0               | 3          | 0                        | 3                        | 3      |       |                 |            |                          |                          |
| extensor digitorum                          | rad      | 0     | 3               | 2          | 3                        | -1                       | 2      | 1     | 5               | 5          | 4                        | 4                        |
| abductor pollicis longus                    | rad      |       |                 |            |                          |                          |        | 3     | 4               | 4          | 1                        | 1                        |
| extensor pollicis longus                    | rad      |       |                 |            |                          |                          |        | 4     | 3               | 4          | -1                       | 0                        |
| extensor pollicis brevis                    | rad      |       |                 |            |                          |                          |        | 1     | 3               | 4          | 2                        | 1                        |
| extensor carpi ulnaris                      | rad      | 0     | 0               | 5          | 0                        | 5                        | 5      | 3     | 3               | 5          | 0                        | 2                        |
| triceps brachii                             | rad      | 2     | 2               | 2          | 0                        | 0                        | 0      | 4     | 5               | 5          | 1                        | 1                        |
| posterior deltoid                           | other    | 4     | 5               | 5          | 1                        |                          | 1      |       |                 |            |                          |                          |
| infraspinatus and teres minor               | other    | 4     | 5               | 5          | 1                        |                          | 1      | 4     | 5               | 5          | 1                        | 1                        |
| AVERAGE                                     |          |       |                 |            | 0.64                     | 0.67                     | 1.21   |       |                 |            | 0.82                     | 0.25                     |
| % PAS of PNS                                |          |       |                 |            | 78                       | 267                      | 121    |       |                 |            |                          | 1.00                     |

(continued)

SUPPLEMENTARY TABLE S1. (CONTINUED)

| PATIENT 4                                   | PAS hand |       |                 |            | PNS hand                |                          |        |       |                 |            |                         |                          |
|---------------------------------------------|----------|-------|-----------------|------------|-------------------------|--------------------------|--------|-------|-----------------|------------|-------------------------|--------------------------|
|                                             | before   | after | 1 month control | during PAS | CHANGE during follow-up | during PAS and follow-up | before | after | 1 month control | during PNS | CHANGE during follow-up | during PNS and follow-up |
|                                             |          |       |                 |            |                         |                          |        |       |                 |            |                         |                          |
| pronator teres and quadratus                | 3        | 2     | 3               | -1         | 1                       | 0                        | 1      | 2     | 3               | 1          | 1                       | 2                        |
| flexor carpi radialis                       | 1        | 3     | 3               | 2          | 0                       | 2                        | 1      | 3     | 2               | 2          | -1                      | 1                        |
| flexor digitorum superficialis              | 3        | 3     | 3               | 0          | 0                       | 0                        | 3      | 3     | 2               | 0          | -1                      | -1                       |
| flexor digitorum profundus (fingers II-III) | 1        | 3     | 4               | 2          | 1                       | 3                        | 3      | 3     | 3               | 0          | 0                       | 0                        |
| flexor pollicis brevis                      | 3        | 3     | 3               | 0          | 0                       | 0                        | 2      | 3     | 4               | 1          | 1                       | 2                        |
| flexor pollicis longus                      | 4        | 4     | 4               | 0          | 0                       | 0                        | 4      | 4     | 4               | 0          | 0                       | 0                        |
| opponens pollicis                           | 1        | 3     | 3               | 2          | 0                       | 2                        | 3      | 2     | 2               | -1         | 0                       | -1                       |
| abductor pollicis brevis                    | 0        | 3     | 3               | 3          | 0                       | 3                        | 3      | 1     | 1               | -2         | 0                       | -2                       |
| adductor pollicis                           | 0        | 3     | 4               | 3          | 1                       | 4                        | 3      | 1     | 1               | -2         | 0                       | -2                       |
| dorsal interossei                           | 1        | 2     | 3               | 1          | 1                       | 2                        | 1      | 2     | 1               | 1          | -1                      | 0                        |
| abductor digiti minimi                      | 2        | 3     | 4               | 1          | 1                       | 2                        | 2      | 3     | 3               | 1          | 0                       | 1                        |
| palmar interossei                           | 1        | 1     | 1               | 0          | 0                       | 0                        | 0      | 1     | 1               | 1          | 0                       | 1                        |
| flexor digitorum profundus (fingers IV-V)   | 1        | 1     | 1               | 0          | 0                       | 0                        | 3      | 1     | 0               | -2         | -1                      | -3                       |
| flexor carpi ulnaris                        | 1        | 2     | 1               | 1          | -1                      | 0                        | 1      | 2     | 1               | 1          | -1                      | 0                        |
| extensor digitorum                          | 1        | 0     | 0               | -1         | 0                       | -1                       | 0      | 1     | 1               | 1          | 0                       | 1                        |
| abductor pollicis longus                    | 4        | 3     | 4               | -1         | 1                       | 0                        | 3      | 1     | 2               | -2         | 1                       | -1                       |
| extensor pollicis longus                    | 3        | 4     | 4               | 1          | 0                       | 1                        | 3      | 3     | 3               | 0          | 0                       | 0                        |
| extensor pollicis brevis                    | 3        | 4     | 4               | 1          | 0                       | 1                        | 3      | 3     | 3               | 0          | 0                       | 0                        |
| extensor carpi radialis                     | 2        | 3     | 4               | 1          | 1                       | 2                        | 1      | 3     | 3               | 2          | 0                       | 2                        |
| extensor carpi ulnaris                      | 2        | 1     | 1               | -1         | 0                       | -1                       | 1      | 3     | 1               | 2          | -2                      | 0                        |
| brachioradialis                             | 3        | 1     | 1               | -2         | 0                       | -2                       | 2      | 1     | 1               | -1         | 0                       | -1                       |
| supinator and biceps brachii (supination)   | 3        | 2     | 3               | -1         | 1                       | 0                        | 1      | 2     | 3               | 1          | 1                       | 2                        |
| triceps brachii                             | 1        | 1     | 1               | 0          | 0                       | 0                        | 0      | 2     | 3               | 2          | 1                       | 3                        |
| serratus anterior                           | 4        | 1     | 3               | -3         | 2                       | -1                       | 4      | 1     | 3               | -3         | 2                       | -1                       |
| anterior deltoid and supraspinatus          | 1        | 1     | 0               | 0          | -1                      | -1                       | 0      | 1     | 0               | 1          | -1                      | 0                        |
| middle deltoid and supraspinatus            | 1        | 1     | 1               | 0          | 0                       | 0                        | 1      | 3     | 1               | 2          | -2                      | 0                        |
| posterior deltoid                           | 4        | 1     | 1               | -3         | 0                       | -3                       | 1      | 3     | 1               | 2          | -2                      | 0                        |
| infraspinatus and teres minor               | 1        | 1     | 1               | 0          | 0                       | 0                        | 0      | 2     | 1               | 2          | -1                      | 1                        |
| biceps and brachialis                       | 3        | 1     | 3               | -2         | 2                       | 0                        | 2      | 1     | 3               | -1         | 2                       | 1                        |
| trapezius lower                             | 2        | 4     | 1               | 2          | -3                      | -1                       | 2      | 4     | 2               | 2          | -2                      | 0                        |
| rhomboids                                   | 4        | 5     | 5               | 1          | 1                       | 1                        | 4      | 5     | 5               | 1          | 1                       | 1                        |
| AVERAGE                                     |          |       |                 | 0.19       | 0.23                    | 0.42                     |        |       |                 | 0.39       | -0.2                    | 0.19                     |
| % PAS of PNS                                |          |       |                 | 50         | 215                     | 217                      |        |       |                 |            |                         |                          |

(continued)

SUPPLEMENTARY TABLE S1. (CONTINUED)

| PATIENT 5                                   | PAS hand |       |                 |            | PNS hand                |                          |        |       |                 |            |                         |                          |      |
|---------------------------------------------|----------|-------|-----------------|------------|-------------------------|--------------------------|--------|-------|-----------------|------------|-------------------------|--------------------------|------|
|                                             | before   | after | 1 month control | during PAS | CHANGE during follow-up | during PAS and follow-up | before | after | 1 month control | during PNS | CHANGE during follow-up | during PNS and follow-up |      |
|                                             |          |       |                 |            |                         |                          |        |       |                 |            |                         |                          |      |
| pronator teres and quadratus                | med      | 1     | 2               | 4          | 1                       | 2                        | 3      | 3     | 4               | 3          | 1                       | -1                       | 0    |
| flexor carpi radialis                       | med      | 0     | 0               | 0          | 0                       | 0                        | 0      | 0     | 1               | 2          | 1                       | 1                        | 2    |
| flexor digitorum superficialis              | med      | 1     | 1               | 1          | 0                       | 0                        | 0      | 1     | 1               | 1          | 0                       | 0                        | 0    |
| flexor digitorum profundus (fingers II-III) | med      | 1     | 1               | 1          | 0                       | 0                        | 0      | 1     | 1               | 1          | 0                       | 0                        | 0    |
| flexor pollicis brevis                      | med      | 1     | 1               | 1          | 0                       | 0                        | 0      | 0     | 0               | 1          | 0                       | 1                        | 1    |
| flexor pollicis longus                      | med      | 1     | 1               | 2          | 0                       | 1                        | 1      | 1     | 3               | 2          | 2                       | -1                       | 1    |
| opponens pollicis                           | med      | 1     | 2               | 2          | 1                       | 0                        | 1      | 0     | 0               | 1          | 0                       | 1                        | 1    |
| abductor pollicis brevis                    | med      | 1     | 0               | 1          | -1                      | 1                        | 0      | 0     | 0               | 0          | 0                       | 0                        | 0    |
| adductor pollicis                           | uln      | 1     | 2               | 4          | 1                       | 2                        | 3      | 1     | 2               | 4          | 1                       | 2                        | 3    |
| dorsal interossei                           | uln      | 0     | 0               | 0          | 0                       | 0                        | 0      | 0     | 1               | 1          | 1                       | 0                        | 1    |
| abductor digiti minimi                      | uln      | 2     | 2               | 1          | 0                       | -1                       | -1     | 2     | 3               | 3          | 1                       | 0                        | 1    |
| palmar interossei                           | uln      | 0     | 0               | 0          | 0                       | 0                        | 0      | 0     | 1               | 2          | 1                       | 1                        | 2    |
| flexor digitorum profundus (fingers IV-V)   | uln      | 1     | 1               | 1          | 0                       | 0                        | 0      | 1     | 1               | 1          | 0                       | 0                        | 0    |
| flexor carpi ulnaris                        | uln      | 0     | 0               | 0          | 0                       | 0                        | 0      | 0     | 0               | 2          | 0                       | 2                        | 2    |
| extensor digitorum                          | rad      | 0     | 0               | 0          | 0                       | 0                        | 0      | 0     | 0               | 0          | 0                       | 0                        | 0    |
| abductor pollicis longus                    | rad      | 1     | 1               | 2          | 0                       | 1                        | 1      | 0     | 0               | 1          | 0                       | 1                        | 1    |
| extensor pollicis longus                    | rad      | 1     | 3               | 4          | 2                       | 1                        | 3      | 0     | 3               | 2          | 3                       | -1                       | 2    |
| extensor pollicis brevis                    | rad      | 2     | 2               | 4          | 0                       | 2                        | 2      | 0     | 1               | 2          | 1                       | 1                        | 2    |
| extensor carpi radialis                     | rad      | 3     | 4               | 3          | 1                       | -1                       | 0      | 0     | 1               | 0          | 1                       | -1                       | 0    |
| extensor carpi ulnaris                      | rad      | 0     | 1               | 2          | 1                       | 1                        | 2      | 0     | 0               | 0          | 0                       | 0                        | 0    |
| supinator and biceps brachii (supination)   | rad      | 2     | 5               | 3          | 3                       | 1                        | 1      | 3     | 4               | 2          | 1                       | -2                       | -1   |
| triceps brachii                             | rad      | 1     | 1               | 2          | 0                       | 1                        | 1      | 1     | 0               | 1          | -1                      | 1                        | 0    |
| serratus anterior                           | other    | 1     | 5               | 5          | 4                       |                          | 4      | 2     | 1               | 5          | -1                      | 4                        | 3    |
| anterior deltoid and supraspinatus          | other    | 2     | 3               | 4          | 1                       | 1                        | 2      | 2     | 1               | 1          | -1                      | 0                        | -1   |
| middle deltoid and supraspinatus            | other    | 4     | 4               | 4          | 0                       | 0                        | 0      | 4     | 4               | 4          | 0                       | 0                        | 0    |
| posterior deltoid                           | other    |       |                 |            |                         |                          |        | 3     | 4               | 3          | 1                       | -1                       | 0    |
| infraspinatus and teres minor               | other    | 2     | 4               | 3          | 2                       | -1                       | 1      | 0     | 1               | 1          | 1                       | 0                        | 1    |
| trapezius lower                             | other    | 1     | 2               | 1          | 1                       | -1                       | 0      | 2     | 1               | 1          | -1                      | 0                        | -1   |
| trapez. middle & rhomb                      | other    | 4     | 5               | 5          | 1                       | 1                        | 1      | 4     | 5               | 5          | 1                       | 1                        | 1    |
| rhomboids                                   | other    | 4     | 5               | 5          | 1                       | 1                        | 1      | 4     | 5               | 5          | 1                       | 1                        | 1    |
| AVERAGE                                     |          |       |                 |            | 0.66                    | 0.36                     | 0.9    |       |                 |            | 0.47                    | 0.29                     | 0.73 |
| % PAS of PNS                                |          |       |                 |            | 140                     | 126                      | 122    |       |                 |            |                         |                          |      |

1: palpable or visible contraction; 2: active movement, full range of motion with gravity eliminated; 3: same as 2 against gravity; 4: same as 3 and moderate resistance in a muscle-specific position; 5: same as 3 and sufficient resistance to be considered normal  
 med, median; PAS, paired associative stimulation; PNS, peripheral nerve stimulation; rad, radial; uln, ulnar.
