# Supplementary material for: Long-Term Paired Associative Stimulation Enhances Motor Output of the Tetraplegic Hand
Source: PubMed Central journal article supplement — J Neurotrauma. 2017 Sep 15;34(18):2668–74. doi: 10.1089/neu.2017.4996 (PMC5610384; doi:10.1089/neu.2017.4996), 2017-09-15
Supplement: Supp_Table2.pdf [file Supp_Table2.pdf]

SUPPLEMENTARY TABLE S2. RESULTS FOR NECK, BODY, AND LEG MUSCLES

| <i>Data from 5 patients</i> | <i>PAS side</i>                             |                                             | <i>PNS side</i>                             |                                              |
|-----------------------------|---------------------------------------------|---------------------------------------------|---------------------------------------------|----------------------------------------------|
|                             | <i>Change during PAS</i>                    | <i>Change during PAS and follow-up</i>      | <i>Change during PNS</i>                    | <i>Change during PNS and follow-up</i>       |
| Neck and body muscles       | 0.42 ± 0.32, <i>p</i> =0.74<br>(19 muscles) | 0.31 ± 0.28, <i>p</i> =0.56<br>(19 muscles) | 0.05 ± 0.25, <i>p</i> =0.41<br>(20 muscles) | -0.01 ± 0.17, <i>p</i> =0.59<br>(20 muscles) |
| Leg muscles                 | 0.16 ± 0.07, <i>p</i> =0.13<br>(90 muscles) | 0.24 ± 0.21, <i>p</i> =0.06<br>(90 muscles) | 0.01 ± 0.14, <i>p</i> =0.65<br>(90 muscles) | 0.15 ± 0.12, <i>p</i> =0.06<br>(90 muscles)  |

The analysis was done in the same way as for the hand muscles.  
 PAS, paired associative stimulation; PNS, peripheral nerve stimulation.
