# Supplementary material for: Long-Term Paired Associative Stimulation Enhances Motor Output of the Tetraplegic Hand
Source: PubMed Central journal article supplement — J Neurotrauma. 2017 Sep 15;34(18):2668–74. doi: 10.1089/neu.2017.4996 (PMC5610384; doi:10.1089/neu.2017.4996), 2017-09-15
Supplement: Supp_Table3.pdf [file Supp_Table3.pdf]

SUPPLEMENTARY TABLE S3. RESULTS OF THE SPASTICITY EVALUATION BY THE MODIFIED ASWORTH SCALE

| <i>Data from 5 patients</i>           | <i>PAS side</i>          |                                 | <i>PNS side</i>          |                                 |
|---------------------------------------|--------------------------|---------------------------------|--------------------------|---------------------------------|
|                                       | <i>Change during PAS</i> | <i>Change PAS and follow-up</i> | <i>Change during PNS</i> | <i>Change PNS and follow-up</i> |
| Upper extremity points<br>(20 joints) | $0.4 \pm 0.4, p=0.32$    | $0.2 \pm 0.2, p=0.32$           | $0.6 \pm 0.4, p=0.18$    | $1 \pm 1, p=0.32$               |
| Lower extremity points<br>(30 joints) | $2.2 \pm 2.1, p=0.46$    | $-0.2 \pm 1, p=0.79$            | $1.2 \pm 2.1, p=0.46$    | $-0.8 \pm 0.9, p=0.41$          |

The analysis was done in the same way as for the motor scores.

PAS, paired associative stimulation; PNS, peripheral nerve stimulation.
